# Supplementary material
Source: PubMed Central journal article supplement (PMC7869659)
Supplement: original-submission.pdf [file original-submission.pdf]

1  
2  
3 **1 Intradermal Pre-Exposure Rabies Vaccination: A Six-Year Retrospective Observational**  
4  
5 **2 Study in a Canadian Travel Clinic**  
6

7  
8 Kong, Ling Yuan, M.D.<sup>1</sup>, Vincelette, Jean, M.D.<sup>2,3</sup>, Laplante, Gaétan, M.D.<sup>2</sup>, Hudon Duchesne,  
9  
10 Jo-Anne<sup>2</sup>, Michael, Libman, M.D.<sup>1</sup>, Barkati, Sapha M.D.<sup>1,2,3</sup>  
11

12  
13 1. J.D. MacLean Centre for Tropical Diseases, McGill University Health Centre  
14

15  
16 2. Clinique Santé-voyage de la Fondation du CHUM  
17

18  
19 3. Centre Hospitalier de l'Université de Montréal (CHUM)  
20

21  
22 9 Submitted to: Canadian Medical Association Journal  
23

24  
25 10 Manuscript Category: Research  
26

27  
28 11 Word count: Text 1910 Abstract 244  
29

30  
31 12 Figures: 2  
32

33  
34 13 Tables: 4  
35

36  
37 15 Corresponding author:  
38

39  
40 16 Sapha Barkati  
41

42  
43 17 Department of Medical Microbiology and Infectious Diseases  
44

45  
46 18 Centre Hospitalier de l'Université de Montréal  
47

48  
49 19 1051, Sanguinet Street  
50

51  
52 20 Montreal, Quebec, Canada H2X 0C1  
53

54  
55 21 Tel: (514) 890-8000  
56

57  
58 22 Fax: (514) 412-7412  
59

60  
23 Email: sapha.barkati.chum@ssss.gouv.qc.ca

1  
2  
3 **1 Abstract**  
4

5  
6 2

7  
8 **3 Background**  
9

10 Few travelers receive rabies pre-exposure prophylaxis (PrEP) with vaccination. The intradermal  
11 (ID) route for rabies vaccination is endorsed by the Canadian National Advisory Committee on  
12 Immunization, and was implemented at a large travel clinic in 2008. We evaluated the effect of  
13 ID vaccine availability on PrEP uptake and rates of seroconversion with ID vaccination.  
14  
15  
16  
17  
18  
19  
20  
21

22 **9 Methods**  
23

24 A retrospective, observational study using data from December 2008 to December 2014 was  
25 conducted. The proportions of travelers receiving PrEP during a one-year period prior to ID  
26 PrEP introduction was compared with PrEP given during the study period. Post-vaccination  
27 antibody titers were measured for ID PrEP recipients. Demographic and travel characteristics  
28 were compared between vaccinated and unvaccinated travelers, and travelers choosing ID and  
29 IM PrEP, using univariate and multivariate analyses.  
30  
31  
32  
33  
34  
35  
36  
37  
38  
39  
40

41 **17 Results**  
42

43 The proportion of travelers receiving PrEP increased after ID PrEP introduction. Seroconversion  
44 occurred in 99.9% of ID PrEP recipients. Travelers receiving PrEP were older and had longer  
45 travel duration compared to those not receiving PrEP. Travelers to Asia were more likely to  
46 receive PrEP, but those visiting friends and relatives were less likely to be vaccinated. Travelers  
47 choosing ID PrEP were younger than those receiving IM PrEP, and were more likely to be  
48 traveling for tourism.  
49  
50  
51  
52  
53  
54  
55  
56  
57  
58  
59  
60

1

**2 Interpretation**

3 Introduction of ID PrEP was associated with an increase in vaccination rates. Reduced cost may  
4 be responsible for the increased coverage among young travelers and tourists. Seroconversion  
5 rate after ID vaccination was 99.9%, supporting ID PrEP effectiveness in immunocompetent  
6 travelers.

Confidential

## 1 Introduction

2  
3  
4  
5  
6  
7  
8 Rabies virus infection produces a nearly uniformly fatal encephalitis, and is most commonly  
9  
10 transmitted to humans via the bite of an infected animal. The disease causes 60,000 deaths per  
11  
12 year in the developing world, but remains a rare diagnosis in travelers<sup>1</sup>. However, travelers  
13  
14 frequently seek medical advice for animal bites or scratches, sometimes requiring rabies post-  
15  
16 exposure prophylaxis (PEP), resulting in disruption of travel plans<sup>2</sup>. PrEP greatly facilitates PEP  
17  
18 measures<sup>3</sup>. When PEP is indicated, previously immunized individuals require only two doses of  
19  
20 vaccine, while unimmunized individuals require four to five doses of vaccine in addition to  
21  
22 rabies immune globulin (RIG). The latter is often not easily available in the region where the  
23  
24 injury occurs<sup>3</sup>. In fact, only a small proportion of travelers receive RIG with post-exposure  
25  
26 prophylaxis in the country of exposure<sup>4</sup>. The Canadian Immunization Guide produced by the  
27  
28 National Advisory Committee on Immunization (NACI) for the Public Health Agency of Canada  
29  
30 recommends PrEP for people at high risk of close contact with potentially rabid animals,  
31  
32 including travelers to endemic areas with poor access to medical care and timely PEP<sup>3</sup>. Two  
33  
34 rabies vaccine preparations are licensed in Canada: IMOVAX Rabies, the human diploid cell  
35  
36 vaccine (HDCV); and RabAvert, the purified chick embryo cell rabies vaccine (PCECV)<sup>3</sup>. Both  
37  
38 are inactivated virus vaccines and are only available as 1.0 ml intramuscular (IM) doses.  
39  
40 However, ID administration of these vaccines requires only 0.1 ml per dose, thus reducing cost  
41  
42 by increasing the number of doses available from a single vial. At our clinic, ID vaccination cost  
43  
44 to the traveler was approximately half that of IM. ID vaccination for PrEP has been demonstrated  
45  
46 to be safe and immunogenic in immunocompetent individuals<sup>5-8</sup>, and is endorsed by NACI for  
47  
48 use in PrEP<sup>3</sup>. It is recommended that ID vaccine should only be administered by trained staff,  
49  
50  
51  
52  
53  
54  
55  
56  
57  
58  
59  
60

1  
2  
3 1 that a single vial be used within a 6-hour period after opening, that the cold chain should always  
4  
5 2 be preserved, and that post-immunization antibody titres should be determined at least two weeks  
6  
7 3 after completion of the vaccine series<sup>3</sup>. Vaccine costs can be minimized by grouping vaccinee  
8  
9 4 appointment, and using needles and syringes with low “dead space” and consequent vaccine  
10  
11 5 wastage.  
12  
13 6  
14

15  
16  
17 7 In December 2008, ID PrEP was implemented at the Clinique Santé-Voyageur de la Fondation  
18  
19 8 du Centre Universitaire de l'Université de Montréal (CHUM). We reviewed data from six years  
20  
21 9 of experience with ID PrEP from 2008 to 2014, with four objectives. Firstly, we evaluated the  
22  
23 10 impact of ID PrEP introduction on the proportion of travelers accepting PrEP. Second, we  
24  
25 11 documented the seroconversion rate among travelers receiving ID PrEP in our clinic. Third, we  
26  
27 12 described and compared the characteristics of travelers who received PrEP to those who did not.  
28  
29 13 Finally, we compared the characteristics of travelers who chose ID PrEP to those who received  
30  
31 14 IM PrEP.  
32  
33  
34  
35  
36  
37  
38  
39  
40  
41  
42  
43  
44  
45  
46  
47  
48  
49  
50  
51  
52  
53  
54  
55  
56  
57  
58  
59  
60

## 1 **Methods**

2  
3  
4  
5  
6  
7  
8  
9  
10  
11  
12  
13  
14  
15  
16  
17  
18  
19  
20  
21  
22  
23  
24  
25  
26  
27  
28  
29  
30  
31  
32  
33  
34  
35  
36  
37  
38  
39  
40  
41  
42  
43  
44  
45  
46  
47  
48  
49  
50  
51  
52  
53  
54  
55  
56  
57  
58  
59  
60

1  
2  
3  
4  
5  
6  
7  
8  
9  
10  
11  
12  
13  
14  
15  
16  
17  
18  
19  
20  
21  
22  
23  
24  
25  
26  
27  
28  
29  
30  
31  
32  
33  
34  
35  
36  
37  
38  
39  
40  
41  
42  
43  
44  
45  
46  
47  
48  
49  
50  
51  
52  
53  
54  
55  
56  
57  
58  
59  
60

The Clinique Santé-voyage de la Fondation du CHUM is one of the largest travel clinics in the province of Quebec and received approximately 20 000 visits per year for pre-travel assessment over the last 10 years. In December 2008, ID PrEP was introduced by offering a weekly clinic, staffed by nurses trained and experienced in intradermal administration. Patients presenting for pre-travel assessment with an indication for rabies PrEP were offered the options of ID and IM routes. Factors associated with ID vaccination, such as decreased cost, potential increased local injection reaction, and need to do post-vaccination serology to verify response, were explained to the patients. Although Canada experienced a shortage of rabies vaccine during 2008-2009, stocks were sufficient to continue offering a free choice of IM or ID administration. All vaccines were given on days 0, 7, and 21 or 28. Groups of three or more patients were booked per intradermal vaccination clinic to minimize vaccine wastage. Post-vaccination antibody titers were measured two to four weeks after the last dose for all recipients. Serum samples were sent to the National Microbiology Laboratory (NML) and tested for rabies antibody levels using a modified Fluorescent Antibody Virus Neutralization (FAVN) assay. An adequate response after vaccination was defined as  $\geq 0.5$  IU/ml.

19 A retrospective, observational study was conducted using data from December 2008 through  
20 December 2014. Data on all travelers presenting for pre-travel assessment were retrieved from a  
21 computerized database, with only one pre-travel assessment included per traveler. Variables  
22 collected were age, gender, receipt of PrEP, type and route of administration where applicable,  
23 country and continent of travel, reason for travel, duration of travel, and whether travel was alone,

1  
2  
3 1 in a couple or in a group. The number of travelers receiving PrEP was reviewed for a one-year  
4  
5 2 period prior to implementation of ID PrEP (December 2006 to December 2007) and compared  
6  
7  
8 3 with the number of travelers vaccinated during the study period.  
9  
10 4

11  
12 5 To compare traveler characteristics between non-vaccinated patients and vaccinated patients, and  
13  
14 6 between patients receiving ID PrEP and patients receiving IM PrEP, categorical variables were  
15  
16 7 expressed in frequencies and percentages and compared using a chi-square test. Continuous  
17  
18 8 variables were expressed as means and standard deviations and compared using ANOVA.  
19  
20 9 Univariate and multivariate analyses were performed. Statistical analyses were carried out using  
21  
22 10 SPSS version 20.  
23  
24  
25  
26  
27  
28  
29  
30  
31  
32  
33  
34  
35  
36  
37  
38  
39  
40  
41  
42  
43  
44  
45  
46  
47  
48  
49  
50  
51  
52  
53  
54  
55  
56  
57  
58  
59  
60

## 1        1    **Results**

2  
3  
4  
5        2  
6  
7  
8        3    The implementation of ID PrEP in December 2008 was followed by a shortage of rabies vaccine  
9  
10       4    in 2008-2009. From December 2009 to December 2014, an average of 300 travelers were  
11  
12       5    vaccinated annually (Figure 1). In comparison, from December 2006 to December 2007, prior to  
13  
14       6    the implementation of ID PrEP, only 183 vaccine series were given. The number of pre-travel  
15  
16       7    visits decreased from 24022 to 14336 from 2006 to 2014 (figure 1).  
17  
18  
19  
20       8

21  
22       9    Of the 941 recipients of ID PrEP, 940 (99.9%) seroconverted with an antibody titer above 0.5  
23  
24       10    IU/ml when measured two to four weeks after completion of the vaccine series. One single  
25  
26       11    traveler did not seroconvert at two weeks and could not be tested at four weeks to assess for  
27  
28       12    delayed seroconversion because of imminent travel. A single booster IM dose was given to this  
29  
30       13    patient.  
31  
32  
33

34       14  
35  
36       15    Examining data from December 2008 to December 2014, a total of 37032 travelers presented for  
37  
38       16    pre-travel assessment during the study period (Figure 2). A total of 1721 (4.6%) travelers  
39  
40       17    received PrEP, while 35311 (95.4%) did not. Among those who received PrEP, 941 (54.7%)  
41  
42       18    received ID PrEP, while 780 (45.3%) received IM PrEP. In particular, among travelers to Asia  
43  
44       19    and Africa, 8.9% and 3.9% respectively received PrEP.  
45  
46  
47

48       20  
49  
50       21    Comparing travelers receiving PrEP with those not receiving PrEP (Table 1), we found that  
51  
52       22    travelers receiving PrEP were older with 94.6% of PrEP recipients being over 18, compared to  
53  
54       23    82.2% in those not receiving PrEP. There was no significant difference between genders.  
55  
56  
57  
58  
59  
60



1  
2  
3 1 Travelers receiving PrEP had longer travel duration compared to the non-vaccinated group  
4  
5 2 (mean duration of 16.7 weeks versus 5.2 weeks), and a lower proportion of vaccinated travelers  
6  
7 3 had travel duration of less than four weeks (38.6% versus 75.8%). Travelers to Asia were most  
8  
9 4 likely to be vaccinated, whereas travelers to the Americas were least likely. Vaccinated travelers  
10  
11 5 more often were traveling for work/business, education/research or volunteer/aid work, while  
12  
13 6 travelers visiting friends and relatives (VFR) were less likely to be vaccinated. Those traveling in  
14  
15 7 groups were more frequently unvaccinated. These results were confirmed on univariate and  
16  
17 8 multivariate analyses (Table 2), with the exception of the finding that those traveling for  
18  
19 9 work/business were more likely to be vaccinated, which did not reach statistical significance in  
20  
21 10 multivariate analysis.  
22  
23  
24  
25  
26  
27  
28

29 12 When comparing travelers receiving ID PrEP versus IM PrEP (Tables 3 and 4), those receiving  
30  
31 13 ID PrEP were younger with a mean age of 34.6 years compared to 37.2 years in the IM PrEP  
32  
33 14 group. There was no significant difference between genders or mean duration of travel between  
34  
35 15 the two groups on multivariate analyses. More travelers to Asia received ID PrEP, but this was  
36  
37 16 not statistically significant in multivariate analyses. Those traveling for business and  
38  
39 17 volunteer/aid work more often received IM PrEP, whereas those traveling for tourism more often  
40  
41 18 received ID PrEP.  
42  
43  
44  
45  
46  
47  
48  
49  
50  
51  
52  
53  
54  
55  
56  
57  
58  
59  
60

## 1 Interpretation

2  
3  
4  
5  
6  
7  
8 Overall, few travelers (4.6%) seen at our travel clinic received PrEP, even among travelers to  
9  
10 highly endemic areas where proper post exposure prophylaxis is often difficult to obtain. The  
11  
12 proportion of travelers receiving a series of rabies vaccine administered increased substantially  
13  
14 after introduction of ID PrEP, although the number of patient visits decreased during this period,  
15  
16  
17  
18  
19  
20  
21  
22  
23  
24  
25  
26  
27  
28  
29  
30  
31  
32  
33  
34  
35  
36  
37  
38  
39  
40  
41  
42  
43  
44  
45  
46  
47  
48  
49  
50  
51  
52  
53  
54  
55  
56  
57  
58  
59  
60

9 The low rate of pre-travel vaccination is consistent with other studies<sup>9,10</sup> despite that most  
10  
11 travelers do not receive optimal prophylaxis including RIG after exposure to a potentially rabid  
12  
13 animal<sup>4</sup>. The main barrier cited by travelers against vaccination was cost<sup>9</sup>. As such, ID PrEP has  
14  
15 been endorsed as an alternative to IM PrEP that is less costly, while still being immunogenic and  
16  
17  
18  
19  
20  
21  
22  
23  
24  
25  
26  
27  
28  
29  
30  
31  
32  
33  
34  
35  
36  
37  
38  
39  
40  
41  
42  
43  
44  
45  
46  
47  
48  
49  
50  
51  
52  
53  
54  
55  
56  
57  
58  
59  
60

15 The seroconversion rate of travelers receiving ID PrEP was 99.9%. Seroconversion rates have  
16  
17 previously been shown to be above 95%<sup>13</sup>, and our six-year experience confirms this. No  
18  
19  
20  
21  
22  
23  
24  
25  
26  
27  
28  
29  
30  
31  
32  
33  
34  
35  
36  
37  
38  
39  
40  
41  
42  
43  
44  
45  
46  
47  
48  
49  
50  
51  
52  
53  
54  
55  
56  
57  
58  
59  
60

20 Travelers receiving PrEP were older and had longer travel duration, presumably due to the  
21  
22 increased perception of risk in these groups, and perhaps financial resources. Travelers to Asia  
23  
24  
25  
26  
27  
28  
29  
30  
31  
32  
33  
34  
35  
36  
37  
38  
39  
40  
41  
42  
43  
44  
45  
46  
47  
48  
49  
50  
51  
52  
53  
54  
55  
56  
57  
58  
59  
60

1  
2  
3 1 This confirms previously described problems with the acceptance of preventive measures in this  
4  
5  
6 2 group, despite attendance at a travel clinic.<sup>16</sup> Travelers choosing to receive ID PrEP were  
7  
8 3 younger than those receiving IM PrEP, and were more likely to be traveling for tourism.  
9  
10 4

11  
12 5 Recognized risk factors for animal-associated rabies exposures in travelers include travel to  
13  
14 6 Southeast Asia, India, and North Africa, young age, and traveling for tourism<sup>14</sup>. Many rabies  
15  
16 7 exposures occurred in the setting of short travel duration and early on in travel<sup>1,14</sup>. However,  
17  
18 8 travelers seeking pre-travel vaccination were more likely to be traveling for longer durations<sup>10</sup>. In  
19  
20 9 our study, younger patients were less likely to receive PrEP overall. However, they were more  
21  
22 10 likely to receive ID PrEP than IM PrEP, Tourists, another at-risk group, were also more likely to  
23  
24 11 receive ID PrEP. Those traveling for business and volunteer/aid work more often received IM  
25  
26 12 PrEP, possibly because vaccine-related costs were often assumed by third parties. Our results  
27  
28 13 support the hypothesis that the reduced cost associated with ID PrEP may allow vaccination of  
29  
30 14 younger travelers and tourists, two groups known to be at heightened risk for rabies exposure.  
31  
32 15  
33  
34  
35  
36  
37  
38

39 16 Some limitations of our study include its retrospective nature and absence of information on the  
40  
41 17 reasons for not administering PrEP (e.g. prior immunity, vaccine not indicated, patient  
42  
43 18 preference, medical contraindication, or insufficient time prior to travel).  
44  
45

46 19 A strength of the study is the large number of travelers analyzed from a single clinic, minimizing  
47  
48 20 the problem of demographic variability. No previous study has compared travelers choosing ID  
49  
50 21 versus IM PrEP.  
51  
52

53 22  
54  
55  
56  
57  
58  
59  
60

1  
2  
3  
4  
5  
6  
7  
8  
9  
10  
11  
12  
13  
14  
15  
16  
17  
18  
19  
20  
21  
22  
23  
24  
25  
26  
27  
28  
29  
30  
31  
32  
33  
34  
35  
36  
37  
38  
39  
40  
41  
42  
43  
44  
45  
46  
47  
48  
49  
50  
51  
52  
53  
54  
55  
56  
57  
58  
59  
60

1 In conclusion, we present our six-year experience with ID PrEP at the Clinique Santé-voyage de  
2 la Fondation du CHUM and demonstrate an increase in rabies PrEP vaccine rates given after its  
3 implementation. Provision of a weekly clinic where many travelers can be vaccinated during a  
4 six-hour period by trained nurses has provided a lower cost alternative for PrEP in our setting.  
5 Moreover, ID PrEP appeared to improve PrEP acceptance among younger traveler and those  
6 traveling for tourism, possibly because of reduced cost. With a seroconversion rate of 99.9% in  
7 our series, ID PrEP is reliable alternative IM PrEP. Promotion of its use should be continued in  
8 an attempt to increase PrEP coverage among at-risk travelers.

Confidential

## 1     **References**

- 2
- 3
- 4
- 5
- 6
- 7
- 8     1.     Gautret P, Harvey K, Pandey P, et al. Animal-associated exposure to rabies virus among
- 9
- 10    4     travelers, 1997-2012. *Emerging infectious diseases* 2015;21:569-77.
- 11
- 12
- 13    5     2.     Leder K, Torresi J, Libman MD, et al. GeoSentinel surveillance of illness in returned
- 14
- 15    6     travelers, 2007-2011. *Ann Intern Med* 2013;158:456-68.
- 16
- 17
- 18    7     3.     Rabies Vaccine. Canadian Immunization Guide, 2015. (Accessed 2017-08-11, at
- 19
- 20    8     [https://www.canada.ca/en/public-health/services/publications/healthy-living/canadian-](https://www.canada.ca/en/public-health/services/publications/healthy-living/canadian-immunization-guide-part-4-active-vaccines/page-18-rabies-vaccine.html)
- 21
- 22    9     [immunization-guide-part-4-active-vaccines/page-18-rabies-vaccine.html](https://www.canada.ca/en/public-health/services/publications/healthy-living/canadian-immunization-guide-part-4-active-vaccines/page-18-rabies-vaccine.html).)
- 23
- 24
- 25    10    4.     Christiansen AH, Rodriguez AB, Nielsen J, Cowan SA. Should travellers to rabies-
- 26
- 27    11    endemic countries be pre-exposure vaccinated? An assessment of post-exposure prophylaxis and
- 28
- 29    12    pre-exposure prophylaxis given to Danes travelling to rabies-endemic countries 2000-12. *J*
- 30
- 31    13    Travel Med 2016;23.
- 32
- 33
- 34    14    5.     Madhusudana SN, Mani RS. Intradermal vaccination for rabies prophylaxis:
- 35
- 36    15    conceptualization, evolution, present status and future. *Expert Rev Vaccines* 2014;13:641-55.
- 37
- 38
- 39    16    6.     Mills DJ, Lau CL, Fearnley EJ, Weinstein P. The immunogenicity of a modified
- 40
- 41    17    intradermal pre-exposure rabies vaccination schedule--a case series of 420 travelers. *J Travel*
- 42
- 43    18    Med 2011;18:327-32.
- 44
- 45
- 46    19    7.     Warrell MJ. Intradermal rabies vaccination: the evolution and future of pre- and post-
- 47
- 48    20    exposure prophylaxis. *Curr Top Microbiol Immunol* 2012;351:139-57.
- 49
- 50
- 51    21    8.     Recuenco S, Warnock E, Osinubi MOV, Rupprecht CE. A single center, open label study
- 52
- 53    22    of intradermal administration of an inactivated purified chick embryo cell culture rabies virus
- 54
- 55    23    vaccine in adults. *Vaccine* 2017;35:4315-20.
- 56
- 57
- 58
- 59
- 60

- 1  
2  
3 1 9. Piyaphanee W, Shantavasinkul P, Phumratanaprapin W, et al. Rabies exposure risk  
4  
5  
6 2 among foreign backpackers in Southeast Asia. *Am J Trop Med Hyg* 2010;82:1168-71.
- 7  
8 3 10. Dolan SB, Jentes ES, Sotir MJ, et al. Pre-exposure rabies vaccination among US  
9  
10 4 international travelers: findings from the global TravEpiNet consortium. *Vector Borne Zoonotic*  
11  
12 5 *Dis* 2014;14:160-7.
- 13  
14  
15 6 11. Wieten RW, Leenstra T, van Thiel PP, et al. Rabies vaccinations: are abbreviated  
16  
17 7 intradermal schedules the future? *Clin Infect Dis* 2013;56:414-9.
- 18  
19  
20 8 12. Khawplod P, Jaijaroensup W, Sawangvaree A, Prakongsri S, Wilde H. One clinic visit  
21  
22 9 for pre-exposure rabies vaccination (a preliminary one year study). *Vaccine* 2012;30:2918-20.
- 23  
24  
25 10 13. Lau C, Sisson J. The effectiveness of intradermal pre-exposure rabies vaccination in an  
26  
27 11 Australian travel medicine clinic. *J Travel Med* 2002;9:285-8.
- 28  
29  
30 12 14. Gautret P, Parola P. Rabies in travelers. *Curr Infect Dis Rep* 2014;16:394.
- 31  
32 13 15. Carrara P, Parola P, Brouqui P, Gautret P. Imported human rabies cases worldwide,  
33  
34 14 1990-2012. *PLoS Negl Trop Dis* 2013;7:e2209.
- 35  
36  
37 15 16. Leder K, Tong S, Weld L, et al. Illness in travelers visiting friends and relatives: a review  
38  
39 16 of the GeoSentinel Surveillance Network. *Clin Infect Dis* 2006;43:1185-93.

40  
41 17  
42  
43  
44  
45  
46  
47  
48  
49  
50  
51  
52  
53  
54  
55  
56  
57  
58  
59  
60

Figure 1. Number of rabies pre-exposure prophylaxis administered, by type, and number of pre-travel visits by year, from 2006-2014

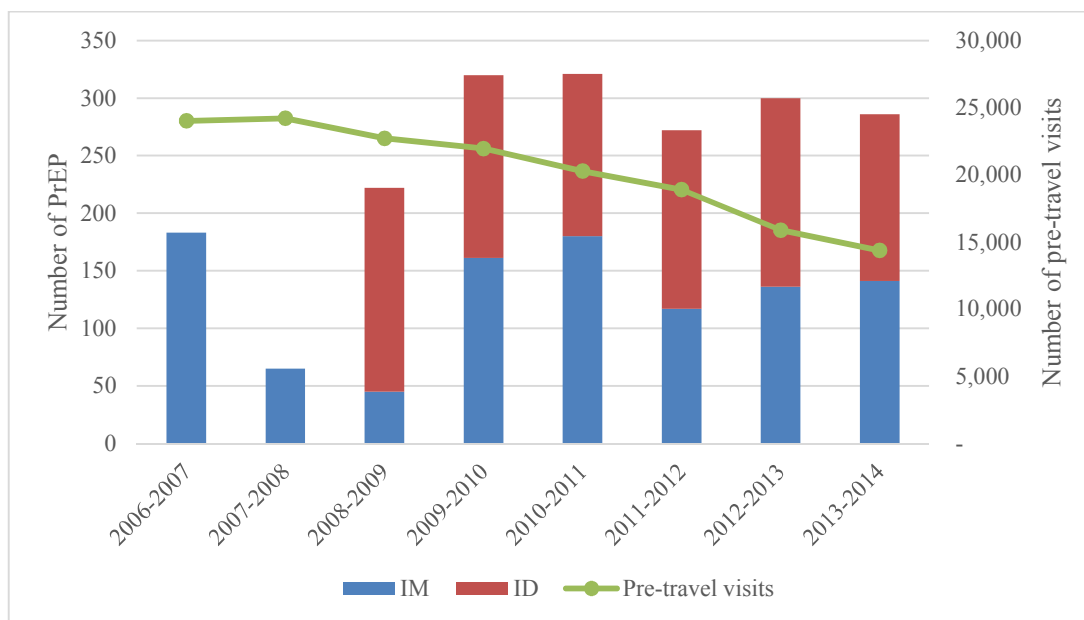

IM: Intramuscular

ID: Intradermal

1  
2  
3  
4  
5  
6  
7  
8  
9  
10  
11  
12  
13  
14  
15  
16  
17  
18  
19  
20  
21  
22  
23  
24  
25  
26  
27  
28  
29  
30  
31  
32  
33  
34  
35  
36  
37  
38  
39  
40  
41  
42  
43  
44  
45  
46  
47  
48  
49  
50  
51  
52  
53  
54  
55  
56  
57  
58  
59  
60

Figure 2. Study population distribution according to PrEP and route of administration.

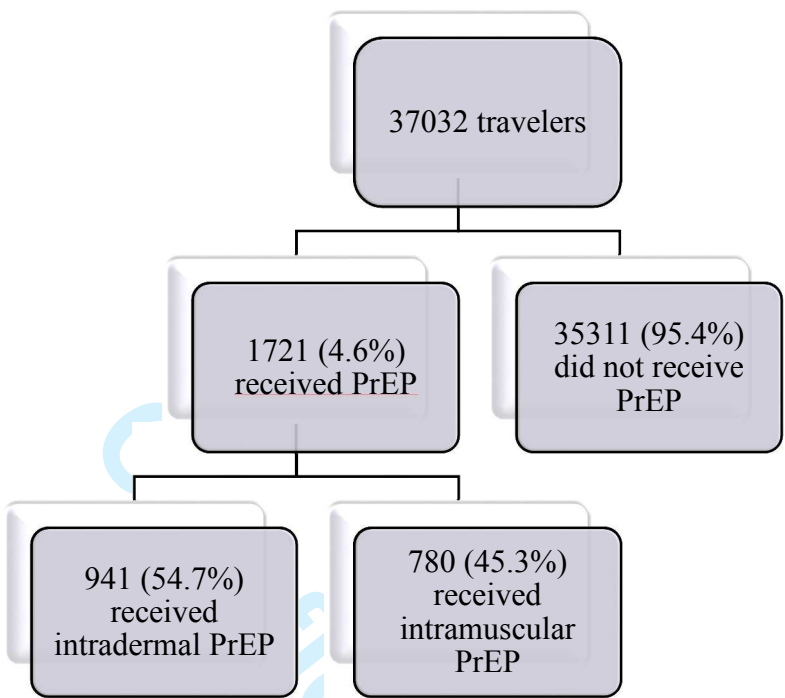



1 Table 1. Demographic and travel characteristics according to PrEP coverage

|                                                     | PrEP              | No PrEP           | P-value |
|-----------------------------------------------------|-------------------|-------------------|---------|
| Continuous variables, mean $\pm$ standard deviation |                   |                   |         |
| Age (years)                                         | 35.77 $\pm$ 15.14 | 32.07 $\pm$ 18.20 | <0.0001 |
| Travel duration (weeks)                             | 16.67 $\pm$ 22.81 | 5.18 $\pm$ 11.41  | <0.0001 |
| Categorical variables, n (% of the category)        |                   |                   |         |
| Age (years)                                         |                   |                   | <0.0001 |
| <18                                                 | 94 (1.5%)         | 6 286 (98.5%)     |         |
| 18-40                                               | 1 044 (5.3%)      | 18 673 (94.7%)    |         |
| 41-60                                               | 470 (5.9%)        | 7 502 (94.1%)     |         |
| >60                                                 | 113 (3.8%)        | 2 835 (96.2%)     |         |
| Travel duration (weeks)                             |                   |                   | <0.0001 |
| $\leq 4$                                            | 602 (2.4%)        | 24 641 (97.6%)    |         |
| 5-12                                                | 385 (6.8%)        | 5 261 (93.2%)     |         |
| 13-24                                               | 253 (14.2%)       | 1 525 (85.8%)     |         |
| 24-52                                               | 248 (21.7%)       | 894 (78.3%)       |         |
| >52                                                 | 72 (27.0%)        | 195 (73.0%)       |         |
| Gender                                              |                   |                   | 0.360   |
| Female                                              | 941 (4.7%)        | 18 898 (95.3%)    |         |
| Male                                                | 780 (4.5%)        | 16 392 (95.5%)    |         |
| Continent                                           |                   |                   | <0.0001 |
| Africa                                              | 274 (3.9%)        | 6 684 (96.1%)     |         |
| Americas                                            | 328 (2.0%)        | 15 696 (98.0%)    |         |

|                     |              |                |         |
|---------------------|--------------|----------------|---------|
| Asia                | 981 (8.9%)   | 10 041 (91.1%) |         |
| Europe              | 14 (3.2%)    | 428 (96.8%)    |         |
| Reason for travel   |              |                | <0.0001 |
| Tourism             | 1 103 (4.2%) | 25 391 (95.8%) |         |
| Work/Business       | 183 (6.4%)   | 2 665 (93.6%)  |         |
| Education/Research  | 56 (5.5%)    | 964 (94.5%)    |         |
| volunteer/aid work  | 255 (10.1%)  | 2 268 (89.9%)  |         |
| Adoption            | 0 (0.0%)     | 93 (100%)      |         |
| VFR                 | 2 (0.2%)     | 992 (99.8%)    |         |
| Number of travelers |              |                | <0.0001 |
| Solo                | 412 (7.4%)   | 5 158 (92.6%)  |         |
| Couple              | 636 (5.1%)   | 11 828 (94.9%) |         |
| Group               | 552 (3.4%)   | 15 763 (96.6%) |         |

1

1 Table 2. Demographic and travel characteristics of travelers receiving PrEP compared with  
 2 travelers not receiving PrEP: univariate and multivariate analyses

| Variables                            | Univariate analysis |                         |         | Multivariate analysis |                         |         |
|--------------------------------------|---------------------|-------------------------|---------|-----------------------|-------------------------|---------|
|                                      | Odds ratio          | 95% confidence interval | p-value | Odds ratio            | 95% confidence interval | p-value |
| Age (per year of age)                | 1.011               | 1.008-1.014             | <0.0001 | 1.015                 | 1.012-1.018             | <0.0001 |
| Female gender                        | 1.046               | 0.950-1.153             | 0.360   | 1.082                 | 0.969-1.209             | 0.160   |
| Travel duration (per week of travel) | 1.032               | 1.030-1.035             | <0.0001 | 1.028                 | 1.026-1.031             | <0.0001 |
| Continent                            |                     |                         |         |                       |                         |         |
| Africa                               | 1.000               | -                       | -       | 1.000                 | -                       | -       |
| Americas                             | 0.510               | 0.433-0.600             | <0.0001 | 0.613                 | 0.512-0.734             | <0.0001 |
| Asia                                 | 2.383               | 2.077-2.734             | <0.0001 | 3.029                 | 2.585-3.549             | <0.0001 |
| Europe                               | 0.798               | 0.462-1.377             | 0.418   | 0.867                 | 0.487-1.542             | 0.627   |
| Reason for travel                    |                     |                         |         |                       |                         |         |
| Tourism                              | 1.000               | -                       | -       | 1.000                 | -                       | -       |
| Work/Business                        | 1.581               | 1.345-1.858             | <0.0001 | 1.061                 | 0.877-1.282             | 0.543   |
| Education/Research                   | 1.337               | 1.015-1.762             | 0.039   | 1.386                 | 1.015-1.894             | 0.040   |
| Cooperation                          | 2.588               | 2.244-2.986             | <0.0001 | 3.906                 | 3.263-4.675             | <0.0001 |
| Adoption                             | -*                  | -                       | -       | -*                    | -                       | -       |
| VFR                                  | 0.046               | 0.12-0.186              | <0.0001 | 0.030                 | 0.004-0.213             | <0.0001 |

1  
2  
3  
4  
5  
6  
7  
8  
9  
10  
11  
12  
13  
14  
15  
16  
17  
18  
19  
20  
21  
22  
23  
24  
25  
26  
27  
28  
29  
30  
31  
32  
33  
34  
35  
36  
37  
38  
39  
40  
41  
42  
43  
44  
45  
46  
47  
48  
49  
50  
51  
52  
53  
54  
55  
56  
57  
58  
59  
60

|                     |       |             |         |       |             |         |
|---------------------|-------|-------------|---------|-------|-------------|---------|
| Number of travelers |       |             |         |       |             |         |
| Solo                | 1.000 | -           | -       | 1.000 | -           | -       |
| Couple              | 0.673 | 0.592-0.765 | <0.0001 | 0.994 | 0.857-1.153 | 0.935   |
| Group               | 0.438 | 0.384-0.500 | <0.0001 | 0.641 | 0.552-0.745 | <0.0001 |

1 \*No traveler traveling for adoption received PrEP

Confidential

1 Table 3. Demographic and travel characteristics according to PrEP route of administration

|                                                     | Intradermal       | Intramuscular     | P-value |
|-----------------------------------------------------|-------------------|-------------------|---------|
| Continuous variables, mean $\pm$ standard deviation |                   |                   |         |
| Age (years)                                         | 34.60 $\pm$ 15.15 | 37.18 $\pm$ 15.02 | <0.0001 |
| Travel duration (weeks)                             | 16.85 $\pm$ 19.70 | 16.44 $\pm$ 26.20 | 0.730   |
| Categorical variables, n (% of the category)        |                   |                   |         |
| Age (years)                                         |                   |                   | 0.079   |
| <18                                                 | 60 (63.8%)        | 34 (36.2%)        |         |
| 18-40                                               | 581 (55.7%)       | 463 (44.3%)       |         |
| 41-60                                               | 246 (52.3%)       | 224 (47.7%)       |         |
| >60                                                 | 54 (47.8%)        | 59 (52.2%)        |         |
| Travel duration (weeks)                             |                   |                   | <0.0001 |
| $\leq$ 4                                            | 302 (50.2%)       | 300 (49.8%)       |         |
| 5-12                                                | 208 (54.0%)       | 177 (46.0%)       |         |
| 13-24                                               | 169 (66.8%)       | 84 (33.2%)        |         |
| 24-52                                               | 156 (62.9%)       | 92 (37.1%)        |         |
| >52                                                 | 32 (44.4%)        | 40 (55.6%)        |         |
| Gender                                              |                   |                   | 0.046   |
| Female                                              | 535 (56.9%)       | 406 (43.1%)       |         |
| Male                                                | 406 (52.1%)       | 374 (47.9%)       |         |
| Continent                                           |                   |                   | <0.0001 |
| Africa                                              | 129 (47.1%)       | 145 (52.9%)       |         |
| Americas                                            | 145 (44.2%)       | 183 (55.8%)       |         |

|                     |             |             |         |
|---------------------|-------------|-------------|---------|
| Asia                | 610 (62.2%) | 371 (37.8%) |         |
| Europe              | 6 (42.9%)   | 8 (57.1%)   |         |
| Reason for travel   |             |             | <0.0001 |
| Tourism             | 696 (63.1%) | 407 (36.9%) |         |
| Work/Business       | 40 (21.9%)  | 143 (78.1%) |         |
| Education/Research  | 38 (67.9%)  | 18 (32.1%)  |         |
| Cooperation         | 101 (39.6%) | 154 (60.4%) |         |
| Adoption            | 0 (0.0%)    | 0 (0.0%)    |         |
| VFR                 | 0 (0.0%)    | 2 (100%)    |         |
| Number of travelers |             |             | 0.001   |
| Solo                | 212 (51.5%) | 200 (48.5%) |         |
| Couple              | 388 (61.0%) | 248 (39.0%) |         |
| Group               | 285 (51.6%) | 267 (48.4%) |         |

1

2

1 Table 4. Demographic and travel characteristics of travelers receiving intradermal PrEP  
 2 compared to travelers receiving intramuscular PrEP: univariate and multivariate analyses

| Variables                            | Univariate analysis |                         |         | Multivariate analysis |                         |         |
|--------------------------------------|---------------------|-------------------------|---------|-----------------------|-------------------------|---------|
|                                      | Odds ratio          | 95% confidence interval | p-value | Odds ratio            | 95% confidence interval | p-value |
| Age (per year of age)                | 0.989               | 0.983-0.995             | <0.0001 | 0.986                 | 0.979-0.993             | <0.0001 |
| Female gender                        | 1.214               | 1.003-1.469             | 0.046   | 1.069                 | 0.857-1.577             | 0.555   |
| Travel duration (per week of travel) | 1.001               | 0.996-1.005             | 0.730   | 1.004                 | 0.999-1.009             | 0.130   |
| Continent                            |                     |                         |         |                       |                         |         |
| Africa                               | 1.000               | -                       | -       | 1.000                 | -                       | -       |
| Americas                             | 0.891               | 0.645-1.229             | 0.481   | 0.834                 | 0.584-1.193             | 0.321   |
| Asia                                 | 1.848               | 1.411-2.421             | <0.0001 | 1.258                 | 0.907-1.743             | 0.169   |
| Europe                               | 0.843               | 0.285-2.494             | 0.758   | 0.396                 | 0.123-1.274             | 0.120   |
| Reason for travel                    |                     |                         |         |                       |                         |         |
| Tourism                              | 1.000               | -                       | -       | 1.000                 | -                       | -       |
| Work/Business                        | 0.164               | 0.113-0.237             | <0.0001 | 0.185                 | 0.123-0.279             | <0.0001 |
| Education/Research                   | 1.235               | 0.695-2.192             | 0.472   | 0.909                 | 0.496-1.663             | 0.756   |
| Cooperation                          | 0.384               | 0.290-0.507             | <0.0001 | 0.444                 | 0.313-0.629             | <0.0001 |

1  
2  
3  
4  
5  
6  
7  
8  
9  
10  
11  
12  
13  
14  
15  
16  
17  
18  
19  
20  
21  
22  
23  
24  
25  
26  
27  
28  
29  
30  
31  
32  
33  
34  
35  
36  
37  
38  
39  
40  
41  
42  
43  
44  
45  
46  
47  
48  
49  
50  
51  
52  
53  
54  
55  
56  
57  
58  
59  
60

|                     |       |             |       |       |             |       |
|---------------------|-------|-------------|-------|-------|-------------|-------|
| Adoption*           | -     | -           | -     | -     | -           | -     |
| VFR**               | -     | -           | -     | -     | -           | -     |
| Number of travelers |       |             |       |       |             |       |
| Solo                | 1.000 | -           | -     | 1.000 | -           | -     |
| Couple              | 1.476 | 1.149-1.896 | 0.002 | 1.183 | 0.887-1.577 | 0.252 |
| Group               | 1.007 | 0.780-1.300 | 0.957 | 1.281 | 0.953-1.723 | 0.101 |

1 \*No traveler traveling for adoption received PrEP

2 \*\*Only two VFR received PrEP, both via the IM route

3

Confidential
